# Supplementary material
Source: publisher site journal article supplement (https://www.dovepress.com/article/158592)
Supplement: Supplementary file 1 [file get_supplementary_file.php%3Ff%3D158592.pdf]

## Supplementary Figures and Tables

Table #1:

| <i>Province</i>             | <i>Medical Marijuana Policies</i>                                                                                                                                                                                                                     |
|-----------------------------|-------------------------------------------------------------------------------------------------------------------------------------------------------------------------------------------------------------------------------------------------------|
| <i>Alberta</i>              | Physicians must register with the College of Physicians and Surgeons of Alberta prior to authorizing medical Marijuana                                                                                                                                |
| <i>British Columbia</i>     | Physicians must do an addiction risk assessment using a validated addiction risk tool prior to authorizing medical marijuana.<br>Physicians must access the province's drug registry (PharmaNet) to document that conventional therapies have failed. |
| <i>Prince Edward Island</i> | Authorizations for medical cannabis cannot be provided to patients via telehealth. Patients must consent to their names being given to the College of Physicians and Surgeons of Prince Edward Island.                                                |
| <i>Québec</i>               | Access to medical marijuana may only be provided as part of a recognized research project and only for specific conditions.                                                                                                                           |

Table #2:

| <b>Adverse Effects On:</b>     | <b>Health Canada Summary<sup>1</sup></b>                                                                                                                                                                                                                                                                                                                                                                                                                                                                                                                                                                                                                                                         | <b>New Study Results</b>                                                                                                                                                                                                                                                                        | <b>Level of Evidence</b> |
|--------------------------------|--------------------------------------------------------------------------------------------------------------------------------------------------------------------------------------------------------------------------------------------------------------------------------------------------------------------------------------------------------------------------------------------------------------------------------------------------------------------------------------------------------------------------------------------------------------------------------------------------------------------------------------------------------------------------------------------------|-------------------------------------------------------------------------------------------------------------------------------------------------------------------------------------------------------------------------------------------------------------------------------------------------|--------------------------|
| Carcinogenesis and mutagenesis | Some studies have suggested an increased incidence of prostate, <sup>2</sup> head and neck, <sup>3</sup> and lung cancer. <sup>4</sup> However, further well-controlled epidemiological studies are required. Health Canada recommends limiting the degree to which cannabis is smoked as evidence regarding its carcinogenic potential is inconsistent. Cannabis smoke cannot be considered safer than tobacco smoke. Some studies have shown cannabis smoke to contain many of the same chemicals as tobacco smoke. <sup>5</sup> Vaporization of cannabis may be a better option as this lower-temperature process produces smaller quantities of toxic by-products. <sup>6-9</sup>            |                                                                                                                                                                                                                                                                                                 |                          |
| Respiratory tract              | Cannabis vs. tobacco smokers retain three-fold higher levels of tar, and five-fold higher levels of carbon monoxide due to differences in smoking topography. <sup>10</sup> Chronic cannabis only smokers show numerous histopathologic changes on mucosal biopsy (e.g. basal cell hyperplasia and squamous cell metaplasia). <sup>11</sup> Mild changes in pulmonary function have been found in heavy cannabis smokers, <sup>12-14</sup> and risk of developing chronic obstructive pulmonary disease later in life may be as great as tobacco smokers. <sup>15</sup> Further research must be conducted to clarify the relationship between cannabis smoking and development of lung disease. | Hancox <i>et al.</i> <sup>16</sup> found that frequent cannabis smoking was associated with symptoms of morning cough, sputum production, and wheeze (all $p < 0.001$ ). However, these symptoms could either improve or worsen with cannabis smoking cessation or continued use, respectively. | 1b                       |
| Immune system                  | Pre-clinical trials have shown cannabinoids to have both immunosuppressive and immunostimulatory effects depending on type, dose, route of administration, length of                                                                                                                                                                                                                                                                                                                                                                                                                                                                                                                             |                                                                                                                                                                                                                                                                                                 |                          |

|                                   |                                                                                                                                                                                                                                                                                                                                                                                                                                                                                                                                                                                                                                                                                                                                                                                                                                                                                                                                                                                                                                                                                                                                                                                                                                                                                                                                                                                                                                                                                                                                                                                                                                                                                                                                                                                                                                                                                                                   |                                                                                                                                                                                                                                                                                                                                                                                                                                                                                                       |
|-----------------------------------|-------------------------------------------------------------------------------------------------------------------------------------------------------------------------------------------------------------------------------------------------------------------------------------------------------------------------------------------------------------------------------------------------------------------------------------------------------------------------------------------------------------------------------------------------------------------------------------------------------------------------------------------------------------------------------------------------------------------------------------------------------------------------------------------------------------------------------------------------------------------------------------------------------------------------------------------------------------------------------------------------------------------------------------------------------------------------------------------------------------------------------------------------------------------------------------------------------------------------------------------------------------------------------------------------------------------------------------------------------------------------------------------------------------------------------------------------------------------------------------------------------------------------------------------------------------------------------------------------------------------------------------------------------------------------------------------------------------------------------------------------------------------------------------------------------------------------------------------------------------------------------------------------------------------|-------------------------------------------------------------------------------------------------------------------------------------------------------------------------------------------------------------------------------------------------------------------------------------------------------------------------------------------------------------------------------------------------------------------------------------------------------------------------------------------------------|
|                                   | <p>exposure, and receptors targeted.<sup>17,18</sup> This immunosuppressive function could be beneficial in conditions having inflammatory characteristics, but problematic when a defense response is necessary as in the case of infection.<sup>17</sup> Cannabinoids, in <i>in vitro</i> and <i>in vivo</i> experiments, have been suggested to impact virus-host interactions,<sup>19</sup> resulting in increased viral replication of HSV-2, HIV-1, KSHV, influenza, and VSV.<sup>20-25</sup> The limited number of human clinical trials pertaining to cannabis use in immunosuppressed individuals, specifically HIV-positive individuals, have shown that cannabis either had no effect on CD4+,<sup>26</sup> or increased CD4+ with no clinically meaningful associations.<sup>27</sup> Cannabis was not associated with increased rates of progression to AIDS,<sup>28</sup> but smoking cannabis did show association with lower plasma concentrations of protease inhibitors indinavir and nelfinavir+, as compared to dronabinol and placebo which had no effect.<sup>29</sup> This decrease in protease inhibitor levels were not associated with elevation in viral load or changes in CD4+ or CD8.<sup>30</sup> One study also showed that HIV-positive patients who were diagnosed with cannabis use disorder had significantly lower adherence to anti-retroviral therapy, had higher viral load, and reported significantly more frequent and severe HIV symptoms or medication side effects than those who used cannabis less than daily or not at all.<sup>31</sup> Smoking cannabis was also associated with poorer outcomes in patients with chronic hepatitis C.<sup>32,33</sup> Therefore, Health Canada recommends clinicians to weigh the potential benefits against the possible risks for each individual patient they consider placing on cannabis and/or cannabinoid therapy.</p> |                                                                                                                                                                                                                                                                                                                                                                                                                                                                                                       |
| Reproductive and endocrine system | <p>Experiment evidence suggests that the endocannabinoid system is located in the male and female reproductive systems and regulates various functions such as folliculogenesis, spermatogenesis, ovulation, fertilization, oviductal transport, implantation, embryo development, pregnancy, and labour.<sup>34</sup> The CB<sub>1</sub> receptors are also found to be in the brain in regions which affect, regulate, or modulate aspects of sexual behavior and function, such as the hypothalamic-pituitary-gonadal axis (HPG axis), genital reflexes, and sexual motivation and inhibition.<sup>35,36</sup> The modulation of the HPA axis can result in hormonal suppression of luteinizing hormone, thyroid stimulation hormone, growth hormone, and prolactin, with probable suppression of follicle stimulating hormone as well.<sup>37,38</sup> Studies showing the effects of cannabis on human sexual behavior and functioning have concluded that it appears to be dose-dependent;<sup>35</sup> low to moderate doses having beneficial effects, such as reported increases in sensitivity to touch and relaxation corresponding to increase in sexual responsiveness, and higher doses having the opposite response, such as inhibiting sexual motivation and erectile function. Currently, studies looking at the effects of cannabis consumption on testosterone levels are inconsistent.<sup>35</sup> However, <i>in vivo</i> and <i>in vitro</i> studies have shown cannabis and <math>\Delta^9</math>-THC to significantly decline sperm</p>                                                                                                                                                                                                                                                                                                                                                  | <p>Morrison <i>et al.</i><sup>43</sup> explored the risk and protective factors associated with consistent contraceptive use. They looked at 18 to 24 year old females attending a 4-year college or university full time and reporting having vaginal intercourse with a male in the past 12 months. Almost 25 % of participants had used cannabis in the past 30 days with less than 4% using it daily. Frequency of cannabis use was found to relate to contraceptive use inversely, with more</p> |

|                                               |                                                                                                                                                                                                                                                                                                                                                                                                                                                                                                                                                                                                                                                                                                                                                                                                                                                                                                                            |                                                                                                                                                                                                                                                                                                                                                                                                                                                                                                                                           |   |
|-----------------------------------------------|----------------------------------------------------------------------------------------------------------------------------------------------------------------------------------------------------------------------------------------------------------------------------------------------------------------------------------------------------------------------------------------------------------------------------------------------------------------------------------------------------------------------------------------------------------------------------------------------------------------------------------------------------------------------------------------------------------------------------------------------------------------------------------------------------------------------------------------------------------------------------------------------------------------------------|-------------------------------------------------------------------------------------------------------------------------------------------------------------------------------------------------------------------------------------------------------------------------------------------------------------------------------------------------------------------------------------------------------------------------------------------------------------------------------------------------------------------------------------------|---|
|                                               | count, concentration and motility, and increase the abnormal sperm morphology. <sup>39-41</sup> A case-control study by Lacson <i>et al.</i> <sup>42</sup> has shown there to be nearly a two-fold increased risk of developing testicular germ-cell tumours of any histologic type and greater than two-fold increased risk of non-seminoma or mixed germ-cell tumors in men who had ever used cannabis compared to those who had never.                                                                                                                                                                                                                                                                                                                                                                                                                                                                                  | frequent cannabis use being associated with more inconsistent contraceptive use.                                                                                                                                                                                                                                                                                                                                                                                                                                                          |   |
| Cardiovascular system                         | Inhalation of cannabis has been shown to cause dose-related tachycardia in both occasional and chronic users. <sup>44-46</sup> However, tolerance can develop with studies showing that after 8 to 10 days of constant dosing with 10 mg of $\Delta^9$ -THC per day, bradycardia, <sup>47</sup> and a decrease in supine blood pressure can be observed. <sup>48</sup> Studies show that inhalation of cannabis smoke can have many effects, especially in those with heart disease. Such effects are: reduction in the amount of exercised needed to cause an angina attack by 50%, <sup>49</sup> a five-fold increased risk of myocardial infarct within first hour of smoking, <sup>46</sup> peripheral vasodilation, <sup>50</sup> postural hypotension, <sup>50</sup> conjunctival reddening, <sup>50</sup> arteritis, <sup>51-54</sup> multi-focal intracranial stenosis, <sup>55</sup> and stroke. <sup>56,57</sup> | A systematic review performed by Jouanous <i>et al.</i> <sup>58</sup> revealed that the use of cannabis-based products can have significant cardiovascular impact, most notably ischemic strokes. Ischemic strokes in young cannabis users were found to be most commonly due to intracranial arterial stenosis ( $p < 0.00001$ ). The association between cannabis exposure and myocardial infarction was found to be weaker than related to strokes. Evidence and data of cannabis use on heart rhythm and cardiac function is limited. | 1 |
| Gastrointestinal system and liver             | Studies have shown a significant association between daily cannabis smoking and moderate to severe fibrosis of the liver, <sup>32</sup> and it being a predictor of fibrosis progression, <sup>33</sup> and steatosis severity; <sup>59</sup> with strong recommendations for chronic hepatitis C patients to abstain from cannabis use. However, studies looking at moderate cannabis use (less than daily) have shown increased anti-retroviral treatment compliance duration attributed to the sustained absence of detectable levels of hepatitis C viral RNA six months after completion of therapy. <sup>60</sup>                                                                                                                                                                                                                                                                                                    |                                                                                                                                                                                                                                                                                                                                                                                                                                                                                                                                           |   |
| CNS:<br>Cognition and psychomotor performance | The most commonly encountered adverse effects by patients using cannabinoids involve the central nervous system (CNS). Dronabinol and nabiximol controlled clinical trials have reported drowsiness, dizziness, and transient impairment of sensory and perceptual function. <sup>61,62</sup> Dronabinol has also shown to have adverse reactions such as a “high” (easy laughing, elation, heightened awareness), anxiety/nervousness, confusion, depersonalization, paranoia, somnolence, abnormal thinking, amnesia, ataxia, and hallucinations. <sup>61</sup> The most common adverse reaction                                                                                                                                                                                                                                                                                                                         | Dougherty <i>et al.</i> <sup>83</sup> explored the cognitive and behavioral (attention, memory, decision-making, and impulsivity) effects of cannabis use in 14 to 17 year-olds. They found                                                                                                                                                                                                                                                                                                                                               | 3 |

experience by 35% of nabiximols users when initially titrating their dose is dizziness, which decreases to 25% of in the long-term.<sup>63</sup>

Cannabis has been shown to impair short-term memory, attention, concentration executive functioning, and visuoperception.<sup>64-66</sup> Its long-term effects on cognition are inconclusive with some studies showing no long-term cognitive decline, while others report cognitive deficits which can persist even after abstinence.<sup>64,66-68</sup> One prospective longitudinal study looking at persistent cannabis use and neuropsychological functioning has reported that cannabis use beginning in adolescence was associated with significant global neuropsychological decline in many domains of functioning which were not fully restored after one or more years of cannabis cessation.<sup>69</sup>

that these adolescent marijuana users exhibited impairment in sustained attention, decision-making, and intelligence, with short-term memory and impulse control being most significantly affected.

Psychomotor performance impairment has been shown to occur in individuals under the influence of cannabinoids.<sup>70</sup> There are no studies specifically looking at psychomotor performance in individuals using cannabis for solely medical purposes. However, a number of studies have been conducted related to the safety of driving under the influence of cannabis. Studies have reported dose-dependent impairment on several performance skills required for safe driving such as motor and perceptual skills,<sup>71-76</sup> with a dose-effect relationship between risk for car accident or fatal crash and blood concentrations of THC.<sup>74-79</sup> Driving performance was further impaired with co-consumption of alcohol.<sup>80</sup> Other studies have shown that this performance impairment to be less significant among heavy cannabis users compared to occasional users, attributed to tolerance development or developed compensatory behaviours.<sup>81,82</sup>

Table #3:

| Reference | Indication       | Medication                    | Outcome                                                                                                                                                                                                                                                                                                                                                                                                                                                                                                                                                                                                                                                                             | Level of Evidence |
|-----------|------------------|-------------------------------|-------------------------------------------------------------------------------------------------------------------------------------------------------------------------------------------------------------------------------------------------------------------------------------------------------------------------------------------------------------------------------------------------------------------------------------------------------------------------------------------------------------------------------------------------------------------------------------------------------------------------------------------------------------------------------------|-------------------|
| 84        | Acute Pain       | Smoked cannabis or Dronabinol | Drug effects in pain sensitivity and tolerance peaked 15 mins after MM was smoked and 180 mins after dronabinol was administered. High marijuana strength (3.56% THC) and dronabinol dose (20 mg) increased the latency to first reported pain 13.1 ±3.9 s and 12.1±5.6s, respectively (p ≤0.01). No difference in pain sensitivity between marijuana and dronabinol. Low marijuana dose and both dronabinol doses, 10 mg and 20 mg, increase pain tolerance versus placebo 4.9±3.4s, 2.8±2.9s and 6.1±4.4s from baseline, respectively (p≤0.05). Both marijuana strengths and high dose dronabinol decreased subjective pain intensity ratings (p≤0.001 and p≤0.05, respectively). | 2                 |
| 85        | Neuropathic pain | Inhaled THC Δ <sup>9</sup> -  | 57% of low-dose (1.29% THC) and 61% high-dose (3.53% THC) experienced 30% pain                                                                                                                                                                                                                                                                                                                                                                                                                                                                                                                                                                                                      | 1                 |

|    |                                        |                                         |                                                                                                                                                                                                                                                                                                                                                                                                                                                |   |
|----|----------------------------------------|-----------------------------------------|------------------------------------------------------------------------------------------------------------------------------------------------------------------------------------------------------------------------------------------------------------------------------------------------------------------------------------------------------------------------------------------------------------------------------------------------|---|
|    |                                        |                                         | reduction ( $p<0.05$ ); however, no statistical significant difference between low- and high-doses ( $p>0.7$ )                                                                                                                                                                                                                                                                                                                                 |   |
| 86 | Neuropathic pain: peripheral           | THC/CBD oromucosal spray                | 28% of treatment vs 16% of placebo group had 30% reduction in pain levels on the PNP 0-10 NRS; Intention-to-treat (ITT) analysis with odds ratio of 1.97 ( $p=0.034$ )<br>Adjusted mean reduction in PNP 0-10 NRS (ITT analysis) -0.34 ( $p=0.139$ ) in favour of benefit with treatment                                                                                                                                                       | 1 |
| 87 | Neuropathic pain: chemotherapy-induced | Sativex® oromucosal spray               | Pain score (NRS-PI) decreased from 6.75 (baseline) $\rightarrow$ 5.5 (mid-treatment) $\rightarrow$ 6.00 (end of treatment) in the treatment group. Pain score decreased from 6.375 $\rightarrow$ 6.31 $\rightarrow$ 6.38 in placebo group ( $p=0.007$ ). Five participants dropped $\geq 2$ points on the NRS-PI scale. NNT = 5.                                                                                                               | 1 |
| 88 | Neuropathic pain: diabetic Neuropathy  | Aerosolized, inhaled $\Delta^9$ -THC    | Statistically significant decreases in spontaneous pain scores in placebo vs low-, medium-, and high-dose THC as well as high-dose versus low- and medium-dose THC ( $p<0.05$ )<br>Statistically significant effect of high dose on foam brush and von Frey doses ( $p<0.001$ ).<br>Average pain intensity score for placebo was 0.44 ( $p=0.031$ ), 0.42 ( $p=0.04$ ), and 1.2 ( $p<0.001$ ) points higher for low-, medium-, and high-doses. | 1 |
| 89 | Neuropathic pain: MS                   | Oral $\Delta^9$ -THC tablets            | No change in pain in challenge phase<br>Decrease in NRS pain score subgroup analysis by 1.27 ( $p=0.0439$ ).<br>No significant decreases in pain intensity with daily home diary entries (-0.47, $p=0.0198$ )                                                                                                                                                                                                                                  | 1 |
| 90 | Neuropathic pain: MS                   | Nabilone                                | Average VAS <sub>pain</sub> during the final 10 days of the trial was significantly lower in the Nabilone versus the placebo group ( $p<0.001$ ); however, VAS <sub>intensity</sub> scores were not significant ( $p=0.77$ ).<br>100% of intervention group noted improvement in condition versus 43% placebo group.                                                                                                                           | 1 |
| 91 | Neuropathic pain                       | Sativex® oromucosal spray               | NRS pain score reduced from 6.9 to 4.2 by the end of the study<br>At least 50% of patients reported 30% improvement in pain at all times.<br>28% of patients were new responders at 30% level of improvement.                                                                                                                                                                                                                                  | 2 |
| 92 | Neuropathic pain                       | Metered-dose inhaler ( $\Delta^9$ -THC) | Reduction of 3.4 points in VAS <sub>pain</sub> scores ( $p=0.001$ ) at 20 mins, return to baseline at 90 mins post-inhalation.                                                                                                                                                                                                                                                                                                                 | 2 |
| 93 | Chronic-non-cancer pain                | Patient-dependent                       | Decrease in pain intensity in cannabis group versus control group; decrease sensory component of pain in cannabis group versus control group.                                                                                                                                                                                                                                                                                                  | 2 |
| 94 | Chronic cancer chronic pancreatitis    | non-pain: Single dose Namisol           | Although there was a decrease in VAS <sub>pain</sub> score there was a similar decrease in the active placebo group, and the results were not statistically significant.                                                                                                                                                                                                                                                                       | 2 |
| 95 | Chronic cancer                         | non-pain: Namisol                       | Mean VAS <sub>pain</sub> scores decreased by 1.6 and 1.9 in THC and placebo groups, respectively ( $p=0.901$ )                                                                                                                                                                                                                                                                                                                                 | 2 |

|    |                                 |                 |                                |                                                                                                      |   |
|----|---------------------------------|-----------------|--------------------------------|------------------------------------------------------------------------------------------------------|---|
|    | chronic abdominal pain          |                 |                                |                                                                                                      |   |
| 96 | Chronic cancer functional pain  | non-pain: chest | Dronabinol                     | Decrease in pain intensity and odynophagia after 28 days of treatment (p=0.04)                       | 2 |
| 97 | Cancer-related Pain             |                 | Nabilone                       | No significant decrease in VAS <sub>pain</sub> between treatment and placebo groups.                 | 2 |
| 98 | Cancer-related pain             |                 | Patient-dependent (90% smoked) | 70% of patients with prescription for medical marijuana indicated an improvement in pain control     | 3 |
| 99 | Cancer-related pain: refractory | opioid          | Sativex® oromucosal spray      | Decrease in pain severity and worst pain scores at all time points versus placebo in long term study | 2 |

1. Canada H. Information for health care professionals: cannabis (marihuana, marijuana) and the cannabinoids. 2013; <https://www.canada.ca/en/health-canada/services/drugs-health-products/medical-use-marijuana/information-medical-practitioners/information-health-care-professionals-cannabis-marihuana-marijuana-cannabinoids.html>.
2. Sidney S, Quesenberry CP, Friedman GD, Tekawa IS. Marijuana use and cancer incidence (California, United States). *Cancer Causes & Control*. 1997;8(5):722-728.
3. Zhang Z-F, Morgenstern H, Spitz MR, et al. Marijuana use and increased risk of squamous cell carcinoma of the head and neck. *Cancer Epidemiology and Prevention Biomarkers*. 1999;8(12):1071-1078.
4. Aldington S, Harwood M, Cox B, et al. Cannabis use and risk of lung cancer: a case-control study. *European Respiratory Journal*. 2008;31(2):280-286.
5. Moir D, Rickert WS, Levasseur G, et al. A comparison of mainstream and sidestream marijuana and tobacco cigarette smoke produced under two machine smoking conditions. *Chemical research in toxicology*. 2007;21(2):494-502.
6. Abrams DI, Vizoso HP, Shade SB, Jay C, Kelly ME, Benowitz NL. Vaporization as a Smokeless Cannabis Delivery System: A Pilot Study. *Clinical Pharmacology & Therapeutics*. 2007;82(5):572-578.
7. Niesink RJM, van Laar MW. Does cannabidiol protect against adverse psychological effects of THC? *Frontiers in Psychiatry*. 2013;4:130.
8. Hazekamp A, Ruhaak R, Zuurman L, van Gerven J, Verpoorte R. Evaluation of a vaporizing device (Volcano®) for the pulmonary administration of tetrahydrocannabinol. *Journal of pharmaceutical sciences*. 2006;95(6):1308-1317.
9. Pomahacova B, Van der Kooy F, Verpoorte R. Cannabis smoke condensate III: the cannabinoid content of vaporised Cannabis sativa. *Inhalation toxicology*. 2009;21(13):1108-1112.
10. Wu T-C, Tashkin DP, Djahed B, Rose JE. Pulmonary hazards of smoking marijuana as compared with tobacco. *New England Journal of Medicine*. 1988;318(6):347-351.
11. Fligiel SE, Roth MD, Kleerup EC, Barsky SH, Simmons MS, Tashkin DP. Tracheobronchial histopathology in habitual smokers of cocaine, marijuana, and/or tobacco. *Chest*. 1997;112(2):319-326.
12. Tashkin DP, Coulson AH, Clark VA, et al. Respiratory symptoms and lung function in habitual heavy smokers of marijuana alone, smokers of marijuana and tobacco, smokers of tobacco alone, and nonsmokers 1–3. *American Review of Respiratory Disease*. 1987;135(1):209-216.
13. Bloom JW, Kaltenborn WT, Paoletti P, Camilli A, Lebowitz MD. Respiratory effects of non-tobacco cigarettes. *Br Med J (Clin Res Ed)*. 1987;295(6612):1516-1518.

14. Roth MD, Arora A, Barsky SH, Kleerup EC, Simmons M, Tashkin DP. Airway inflammation in young marijuana and tobacco smokers. *American journal of respiratory and critical care medicine*. 1998;157(3):928-937.
15. Taylor DR, Poulton R, Moffitt TE, Ramankutty P, Sears MR. The respiratory effects of cannabis dependence in young adults. *Addiction*. 2000;95(11):1669-1677.
16. Hancox RJ, Shin HH, Gray AR, Poulton R, Sears MR. Effects of quitting cannabis on respiratory symptoms. *European Respiratory Journal*. 2015;46(1):80-87.
17. Greineisen WE, Turner H. Immunoactive effects of cannabinoids: considerations for the therapeutic use of cannabinoid receptor agonists and antagonists. *International immunopharmacology*. 2010;10(5):547-555.
18. Tanasescu R, Constantinescu CS. Cannabinoids and the immune system: an overview. *Immunobiology*. 2010;215(8):588-597.
19. Reiss CS. Cannabinoids and viral infections. *Pharmaceuticals*. 2010;3(6):1873-1886.
20. Mishkin E, Cabral G. Delta-9-tetrahydrocannabinol decreases host resistance to herpes simplex virus type 2 vaginal infection in the B6C3F1 mouse. *Journal of general virology*. 1985;66(12):2539-2549.
21. Cabral G, McNerney P, Mishkin E. Delta-9-tetrahydrocannabinol enhances release of herpes simplex virus type 2. *Journal of general virology*. 1986;67(9):2017-2022.
22. Roth MD, Baldwin GC, Tashkin DP. Effects of delta-9-tetrahydrocannabinol on human immune function and host defense. *Chemistry and Physics of Lipids*. 2002;121(1):229-239.
23. Buchweitz JP, Karmaus PW, Harkema JR, Williams KJ, Kaminski NE. Modulation of airway responses to influenza A/PR/8/34 by  $\Delta$ 9-tetrahydrocannabinol in C57BL/6 mice. *Journal of Pharmacology and Experimental Therapeutics*. 2007;323(2):675-683.
24. Zhang X, Wang JF, Kunos G, Groopman JE. Cannabinoid modulation of Kaposi's Sarcoma-associated Herpesvirus infection and transformation. *Cancer research*. 2007;67(15):7230-7237.
25. Herrera RA, Oved JH, Reiss CS. Disruption of IFN- $\gamma$ -mediated antiviral activity in neurons: the role of cannabinoids. *Viral immunology*. 2008;21(2):141-152.
26. Bredt BM, Higuera-Alhino D, Shade SB, Hebert SJ, McCune JM, Abrams DI. Short-term effects of cannabinoids on immune phenotype and function in HIV-1-infected patients. *The Journal of Clinical Pharmacology*. 2002;42(S1).
27. Chao C, Jacobson LP, Tashkin D, et al. Recreational drug use and T lymphocyte subpopulations in HIV-uninfected and HIV-infected men. *Drug and alcohol dependence*. 2008;94(1):165-171.
28. Di Franco MJ, Sheppard HW, Hunter DJ, Tosteson TD, Ascher MS. The lack of association of marijuana and other recreational drugs with progression to AIDS in the San Francisco Men's Health Study. *Annals of Epidemiology*. 1996;6(4):283-289.
29. Kosel BW, Aweeka FT, Benowitz NL, et al. The effects of cannabinoids on the pharmacokinetics of indinavir and nelfinavir. *Aids*. 2002;16(4):543-550.
30. Abrams DI, Hilton JF, Leiser RJ, et al. Short-term effects of cannabinoids in patients with HIV-1 infection: a randomized, placebo-controlled clinical trial. *Annals of internal medicine*. 2003;139(4):258-266.
31. Bonn-Miller MO, Oser ML, Bucossi MM, Trafton JA. Cannabis use and HIV antiretroviral therapy adherence and HIV-related symptoms. *Journal of Behavioral Medicine*. 2014;37(1):1-10.
32. Ishida JH, Peters MG, Jin C, et al. Influence of cannabis use on severity of hepatitis C disease. *Clinical gastroenterology and hepatology*. 2008;6(1):69-75.
33. Hézode C, Roudot-Thoraval F, Nguyen S, et al. Daily cannabis smoking as a risk factor for progression of fibrosis in chronic hepatitis C. *Hepatology*. 2005;42(1):63-71.

34. Karasu T, Marczylo T, Maccarrone M, Konje J. The role of sex steroid hormones, cytokines and the endocannabinoid system in female fertility. *Human Reproduction Update*. 2011;17(3):347-361.
35. Gorzalka BB, Hill MN, Chang SC. Male–female differences in the effects of cannabinoids on sexual behavior and gonadal hormone function. *Hormones and behavior*. 2010;58(1):91-99.
36. Brown TT, Dobs AS. Endocrine effects of marijuana. *The Journal of Clinical Pharmacology*. 2002;42(S1).
37. Sadeu J, Hughes CL, Agarwal S, Foster WG. Alcohol, drugs, caffeine, tobacco, and environmental contaminant exposure: reproductive health consequences and clinical implications. *Critical reviews in toxicology*. 2010;40(7):633-652.
38. Rossato M, Pagano C, Vettor R. The cannabinoid system and male reproductive functions. *Journal of neuroendocrinology*. 2008;20(s1):90-93.
39. Hembree III WC, Nahas GG, Zeidenberg P, Huang HF. Changes in human spermatozoa associated with high-dose marihuana smoking. In: *Marihuana and medicine*. Springer; 1999:367-378.
40. Hong C, Chaput de Saintonge D, Turner P, Fairbairn J. Comparison of the inhibitory action of delta-9-tetrahydrocannabinol and petroleum spirit extract of herbal cannabis on human sperm motility. *Human toxicology*. 1982;1(2):151-154.
41. Whan LB, West MC, McClure N, Lewis SE. Effects of delta-9-tetrahydrocannabinol, the primary psychoactive cannabinoid in marijuana, on human sperm function in vitro. *Fertility and sterility*. 2006;85(3):653-660.
42. Lacson JCA, Carroll JD, Tuazon E, Castelao EJ, Bernstein L, Cortessis VK. Population-based case-control study of recreational drug use and testis cancer risk confirms an association between marijuana use and nonseminoma risk. *Cancer*. 2012;118(21):5374-5383.
43. Morrison LF, Sieving RE, Pettingell SL, Hellerstedt WL, McMorris BJ, Bearinger LH. Protective Factors, Risk Indicators, and Contraceptive Consistency Among College Women. *Journal of Obstetric, Gynecologic & Neonatal Nursing*. 2016;45(2):155-165.
44. Aryana A, Williams MA. Marijuana as a trigger of cardiovascular events: speculation or scientific certainty? *International journal of cardiology*. 2007;118(2):141-144.
45. Hollister LE. Health aspects of cannabis. *Pharmacological reviews*. 1986;38(1):1-20.
46. Mittleman MA, Lewis RA, Maclure M, Sherwood JB, Muller JE. Triggering myocardial infarction by marijuana. *Circulation*. 2001;103(23):2805-2809.
47. Fisher B, Ghuran A, Vadmalai V, Antonios T. Cardiovascular complications induced by cannabis smoking: a case report and review of the literature. *Emergency Medicine Journal*. 2005;22(9):679-680.
48. Cheshier G, Hall W. Effects of cannabis on the cardiovascular and gastrointestinal systems. 1999.
49. Aronow WS, Cassidy J. Effect of marihuana and placebo-marihuana smoking on angina pectoris. *New England Journal of Medicine*. 1974;291(2):65-67.
50. Merritta JC, Cook CE, Davis KH. Orthostatic Hypotension after  $\Delta$  9-Tetrahydrocannabinol Marihuana Inhalation. *Ophthalmic research*. 1982;14(2):124-128.
51. Cottencin O, Karila L, Lambert M, et al. Cannabis arteritis: review of the literature. *Journal of addiction medicine*. 2010;4(4):191-196.
52. Noël B, Ruf I, Panizzon RG. Cannabis arteritis. *Journal of the American Academy of Dermatology*. 2008;58(5):S65-S67.
53. Combemale P, Consort T, Denis-Thelis L, Estival JL, Dupin M, Kanitakis J. Cannabis arteritis. *British Journal of Dermatology*. 2005;152(1):166-169.
54. Disdier P, Granel B, Serratrice J, et al. Cannabis arteritis revisited: ten new case reports. *Angiology*. 2001;52(1):1-5.

55. Wolff V, Lauer V, Rouyer O, et al. Cannabis use, ischemic stroke, and multifocal intracranial vasoconstriction. *Stroke*. 2011;42(6):1778-1780.
56. Singh NN, Pan Y, Muengtaweepansa S, Geller TJ, Cruz-Flores S. Cannabis-related stroke: case series and review of literature. *Journal of Stroke and Cerebrovascular Diseases*. 2012;21(7):555-560.
57. Renard D, Taieb G, Gras-Combe G, Labauge P. Cannabis-related myocardial infarction and cardioembolic stroke. *Journal of Stroke and Cerebrovascular Diseases*. 2012;21(1):82-83.
58. Jouanous E, Raymond V, Lapeyre-Mestre M, Wolff V. What is the current knowledge about the cardiovascular risk for users of cannabis-based products? A systematic review. *Current Atherosclerosis Reports*. 2017;19(6):26.
59. Hézode C, Zafrani ES, Roudot-Thoraval F, et al. Daily cannabis use: a novel risk factor of steatosis severity in patients with chronic hepatitis C. *Gastroenterology*. 2008;134(2):432-439.
60. Sylvestre DL, Clements BJ, Malibu Y. Cannabis use improves retention and virological outcomes in patients treated for hepatitis C. *European journal of gastroenterology & hepatology*. 2006;18(10):1057-1063.
61. Roxane U. Marinol product monograph. *Marinol product monograph*. 1998.
62. Monograph SP. GW Pharma Ltd. *Salisbury, Wiltshire UK SP4 OJQ Submission Control*. (091289).
63. Guy GW, Stott CG. The development of Sativex®—a natural cannabis-based medicine. In: *Cannabinoids as Therapeutics*. Springer; 2005:231-263.
64. Bolla KI, Brown K, Eldreth D, Tate K, Cadet J. Dose-related neurocognitive effects of marijuana use. *Neurology*. 2002;59(9):1337-1343.
65. Rubino T, Parolaro D. Long lasting consequences of cannabis exposure in adolescence. *Molecular and cellular endocrinology*. 2008;286(1):S108-S113.
66. Solowij N, Stephens RS, Roffman RA, et al. Cognitive functioning of long-term heavy cannabis users seeking treatment. *Jama*. 2002;287(9):1123-1131.
67. Lyketsos CG, Garrett E, Liang K-Y, Anthony JC. Cannabis use and cognitive decline in persons under 65 years of age. *American Journal of Epidemiology*. 1999;149(9):794-800.
68. Pope HG, Gruber AJ, Hudson JL, Huestis MA, Yurgelun-Todd D. Neuropsychological performance in long-term cannabis users. *Archives of General Psychiatry*. 2001;58(10):909-915.
69. Johns A. Psychiatric effects of cannabis. *The British Journal of Psychiatry*. 2001;178(2):116-122.
70. Joy JE, Watson Jr SJ, Benson Jr JA. First, do no harm: consequences of marijuana use and abuse. 1999.
71. Ramaekers JG, Moeller M, van Ruitenbeek P, Theunissen EL, Schneider E, Kauert G. Cognition and motor control as a function of  $\Delta$  9-THC concentration in serum and oral fluid: limits of impairment. *Drug and alcohol dependence*. 2006;85(2):114-122.
72. Kurthaler I, Hummer M, Miller C, et al. Effect of cannabis use on cognitive functions and driving ability. *The Journal of clinical psychiatry*. 1999.
73. Ménétrey A, Augsburger M, Favrat B, et al. Assessment of driving capability through the use of clinical and psychomotor tests in relation to blood cannabinoids levels following oral administration of 20 mg dronabinol or of a cannabis decoction made with 20 or 60 mg  $\Delta$ 9-THC. *Journal of analytical toxicology*. 2005;29(5):327-338.
74. Asbridge M, Poulin C, Donato A. Motor vehicle collision risk and driving under the influence of cannabis: evidence from adolescents in Atlantic Canada. *Accident Analysis & Prevention*. 2005;37(6):1025-1034.
75. Kuypers KPC, Legrand S-A, Ramaekers JG, Verstraete AG. A case-control study estimating accident risk for alcohol, medicines and illegal drugs. *PLoS One*. 2012;7(8):e43496.

76. Khiabani HZ, Bramness JG, Bjorneboe A, Mørland Jr. Relationship between THC concentration in blood and impairment in apprehended drivers. *Traffic injury prevention*. 2006;7(2):111-116.
77. Asbridge M, Hayden JA, Cartwright JL. Acute cannabis consumption and motor vehicle collision risk: systematic review of observational studies and meta-analysis. *Bmj*. 2012;344:e536.
78. Elvik R. Risk of road accident associated with the use of drugs: a systematic review and meta-analysis of evidence from epidemiological studies. *Accident Analysis & Prevention*. 2013;60:254-267.
79. Laumon B, Gadegbeku B, Martin J-L, Biecheler M-B. Cannabis intoxication and fatal road crashes in France: population based case-control study. *Bmj*. 2005;331(7529):1371.
80. Downey LA, King R, Papafotiou K, et al. The effects of cannabis and alcohol on simulated driving: influences of dose and experience. *Accident Analysis & Prevention*. 2013;50:879-886.
81. Sewell RA, Poling J, Sofuoglu M. The effect of cannabis compared with alcohol on driving. *The American Journal on Addictions*. 2009;18(3):185-193.
82. Bosker WM, Kuypers KP, Theunissen EL, et al. Medicinal  $\Delta^9$ -tetrahydrocannabinol (dronabinol) impairs on-the-road driving performance of occasional and heavy cannabis users but is not detected in Standard Field Sobriety Tests. *Addiction*. 2012;107(10):1837-1844.
83. Dougherty DM, Mathias CW, Dawes MA, et al. Impulsivity, attention, memory, and decision-making among adolescent marijuana users. *Psychopharmacology*. 2013;226(2):307-319.
84. Cooper ZD, Sandra D C, Haney M. Comparison of the analgesic effects of dronabinol and smoked marijuana in daily marijuana smokers. *Neuropsychopharmacology*. 2013;38(10):1982-1992.
85. Wilsey B, Marcotte T, Deutsch R, Gouaux B, Sakai S, Donaghe H. Low-dose vaporized cannabis significantly improves neuropathic pain. *The Journal of Pain*. 2013;14(2):136-148.
86. Serpell M, Ratcliffe S, Hovorka J, et al. A double-blind, randomized, placebo-controlled, parallel group study of THC/CBD spray in peripheral neuropathic pain treatment. *European Journal of Pain*. 2014;18(7):999-1012.
87. Lynch ME, Cesar-Rittenberg P, Hohmann A. A double-blind, placebo-controlled, crossover pilot trial with extension using and oral mucosal cannabinoid extract for treatment of chemotherapy-induced neuropathic pain. *Journal of Pain and Symptom Management*. 2014;47(1):166-173.
88. Wallace MS, Marcotte TD, Umlauf A, Gouaux B, Atkinson JH. Efficacy of inhaled cannabis on painful diabetic neuropathy. *The Journal of Pain*. 2015;16(7):616-627.
89. van Amerongen G, Kanhai K, Baakman AC, et al. Effects on spasticity and neuropathic pain of an oral formulation of  $\Delta^9$ -tetrahydrocannabinol in patients with progressive multiple sclerosis. *Clinical Therapeutics*. 2017.
90. Turcotte D, Doupe M, Torabi M, et al. Nabilone as an adjunctive to gabapentin for multiple sclerosis-induced neuropathic pain: a randomized controlled trial. *Pain Medicine*. 2015;16(1):149-159.
91. Hoggart B, Ratcliffe S, Ehler E, et al. A multicentre, open-label, follow-on study to assess the long-term maintenance of effect, tolerance and safety of THC/CBD oromucosal spray in the management of neuropathic pain. *Journal of Neurology*. 2015;262(1):27-40.
92. Eisenberg E, Ogintz M, Almog S. The Pharmacokinetics, efficacy, safety, and ease of use of a novel portable metered-dose cannabis inhaler in patients with chronic neuropathic pain: a phase 1a study. *Journal of Pain & Palliative Care Pharmacotherapy*. 2014;28(3):216-225.
93. Ware MA, Wang T, Shapiro S, Collet J-P. Cannabis for the management of pain: assessment of safety study (COMPASS). *The Journal of Pain*. 2015;16(12):1233-1242.
94. de Vries M, Van Rijckevorsel DCM, Vissers KCP, Wilder-Smith OHG, Van Goor H. Single dose delta-9-tetrahydrocannabinol in chronic pancreatitis patients: analgesic efficacy, pharmacokinetics and tolerability. *British Journal of Clinical Pharmacology*. 2016;81(3):525-537.

95. de Vries M, van Rijckevorsel DCM, Vissers KCP, Wilder-Smith OHG, van Goor H. Tetrahydrocannabinol does not reduce pain in patients with chronic abdominal pain in a phase 2 placebo-controlled study. *Clinical Gastroenterology and Hepatology*. 2017;15(7):1079-1086.e1074.
96. Malik Z, Bayman L, Valestin J, Rizvi-Toner A, Hashmi S, Schey R. Dronabinol increases pain threshold in patients with functional chest pain: a pilot double-blind placebo-controlled trial. *Diseases of the Esophagus*. 2017;30(2):1-8.
97. Côté M, Trudel M, Wang C, Fortin A. Improving quality of life with nabilone during radiotherapy treatments for head and neck cancers. *Annals of Otolaryngology, Rhinology & Laryngology*. 2016;125(4):317-324.
98. Waissengrin B, Urban D, Lesham Y, Garty M, Wolf I. Patterns of use of medical cannabis among Israeli cancer patients: a single institution experience. *Journal of Pain and Symptom Management*. 2015;49(2):223-230.
99. Johnson JR, Lossignol D, Brunell-Nugent M, Fallon MT. An open-label extension study to investigate the long-term safety and tolerability of THC/CBD oromucosal spray and oromucosal THC spray in patients with terminal cancer-related pain refractory to strong opioid analgesics. *Journal of Pain and Symptom Management*. 2013;46(2):207-218.
